# Supplementary material for: Level of Murine DDX3 RNA Helicase Determines Phenotype Changes of Hepatocytes In Vitro and In Vivo
Source: MDPI journal article supplement (doi:10.3390/ijms22136958), 2021-06-28
Supplement: s1 [file s1]

**Supplementary Table S1.** List of DDX3 siRNA used in the study.

| siRNA | Sequences, 5'→3'                                     |
|-------|------------------------------------------------------|
| #1    | ccGuAuGcGuGAAuuAuAdTsdT<br>uAuAAUUUcACGcAuACGGdTsdT  |
| #2    | uGcuGAAuGuAAAGAuGAdTsdT<br>UcAAUCUuAcAUUcAGcAdTsdT   |
| #3    | AcAcuuGucuuGAGAuAuudTsdT<br>AAuAUCUcAAGAcAAGUGUdTsdT |
| #4    | AuGcGuGAAuuAuAuAuudTsdT<br>AAuAuAuAAUUUcACGcAUdTsdT  |
| #5    | uGucuuGAGAuAuAAcGAdTsdT<br>UCGUuAAuAUCUcAAGAcAdTsdT  |
| #6    | uGcAcAAGGuGucAAuucudTsdT<br>AGAAUUGAcACCUUGUGcAdTsdT |
| #7    | GuGuGAGcuuuuAAuGuuAdTsdT<br>uAAcAUuAAAAGCUcAcACdTsdT |
| #8    | AuuGGcGacuuGAAAcuAAdTsdT<br>UuAGUUUcAAGUCGCcAAUdTsdT |

|         |                                                  |
|---------|--------------------------------------------------|
| control | cuuAcGcuGAGuAcuucGATsT<br>UCGAAGuACUcAGCGuAAGTsT |
|---------|--------------------------------------------------|

Upper case – ribonucleotide, lower case – 2'-O-methylribonucleotide, s –phosphorothioate group, T - thymidine.

**Supplementary Table S2.** List of primers used in the study.

| Name   | Forward, 5'→3'                | Reverse, 5'→3'                |
|--------|-------------------------------|-------------------------------|
| GAPDH  | TGCACCACCAACTGCTTAGC          | GGCATGGACTGTGGTCATGAG         |
| DDX3   | CAACAGGCAACAACACTGTCCTCCAC    | GAATAGCATGCTTCTGCACTGGAGTTG   |
| DBP    | GGA AAC AGC AAG CCC AAA GAA   | CAG CGG CGC AAA AAG ACT C     |
| CCNE1  | GTG GCT CCG ACC TTT CAG TC    | CAC AGT CTT GTC AAT CTT GGC A |
| CDKN1  | CCT GGT GAT GTC CGA CCT G     | CCA TGA GCG CAT CGC AAT C     |
| MCM3   | AGC GCA GAG AGA CTA CTT GGA   | CAG CCG ATA CTG ATT GTC ACT   |
| CTNNB1 | ATGGAGCCGGACAGAAAAGC          | TGGGAGGTGTCAACATCTTCTT        |
| GSK3   | GCGTTCCCAAGAAGTGGCTTA         | GGTCCAGCTTACGCATAATCTG        |
| ELOVL3 | TTC TCA CGC GGG TTA AAA ATG G | GAG CAA CAG ATA GAC GAC CAC   |
| MMP10  | GAG CCA CTA GCC ATC CTG G     | CTG AGC AAG ATC CAT GCT TGG   |
| C-MYC  | GTC AAG AGG CGA ACA CAC AAC   | TTG GAC GGA CAG GAT GTA TGC   |
| TNF-A  | AGC CCC CAG TCT GTA TCC TT    | GGT CAC TGT CCC AGC ATC TT    |
| PYGO-1 | CCA TCG CGC TGA AGA GAG TTA   | GTG TGT TGG CCT TGC GTT TT    |
| PDK4   | AGG GAG GTC GAG CTG TTC TC    | GGA GTG TTC ACT AAG CGG TCA   |

Upper case – 2'-deoxynucleotide.

**Supplementary Table S3.** Characterization of LNP-siRNA used in the study.

|  |          |                               |                                |
|--|----------|-------------------------------|--------------------------------|
|  | LNP size | siRNA concentration,<br>ng/μl | siRNA entrapment<br>efficiency |
|--|----------|-------------------------------|--------------------------------|

LNP-control

|                                | Size (d.nm):         | % Intensity: | St Dev (d.nm): |
|--------------------------------|----------------------|--------------|----------------|
| <b>Z-Average (d.nm):</b> 72,17 | <b>Peak 1:</b> 79,77 | 100,0        | 26,86          |
| <b>Pdl:</b> 0,125              | <b>Peak 2:</b> 0,000 | 0,0          | 0,000          |
| <b>Intercept:</b> 0,929        | <b>Peak 3:</b> 0,000 | 0,0          | 0,000          |
| <b>Result quality :</b> Good   |                      |              |                |

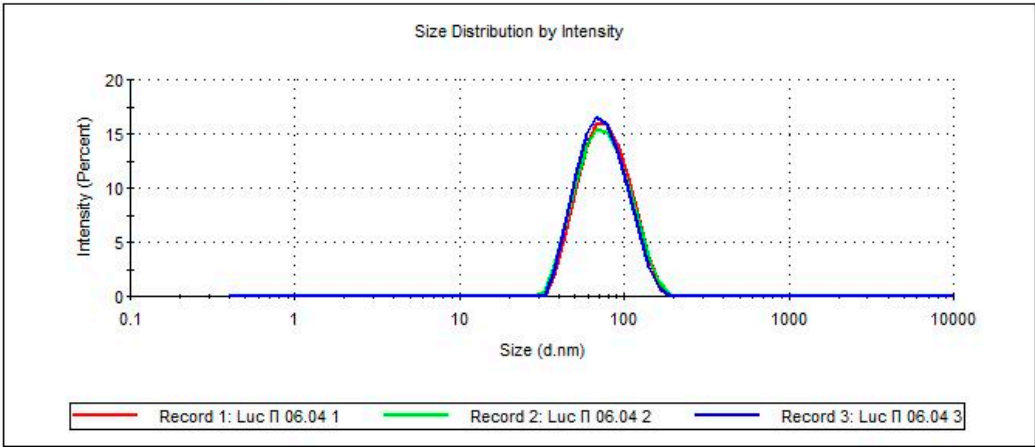

137

63%

LNP-siRNA#5

|                                | Size (d.nm):         | % Intensity: | St Dev (d.nm): |
|--------------------------------|----------------------|--------------|----------------|
| <b>Z-Average (d.nm):</b> 75,93 | <b>Peak 1:</b> 80,87 | 100,0        | 21,15          |
| <b>Pdl:</b> 0,049              | <b>Peak 2:</b> 0,000 | 0,0          | 0,000          |
| <b>Intercept:</b> 0,936        | <b>Peak 3:</b> 0,000 | 0,0          | 0,000          |
| <b>Result quality :</b> Good   |                      |              |                |

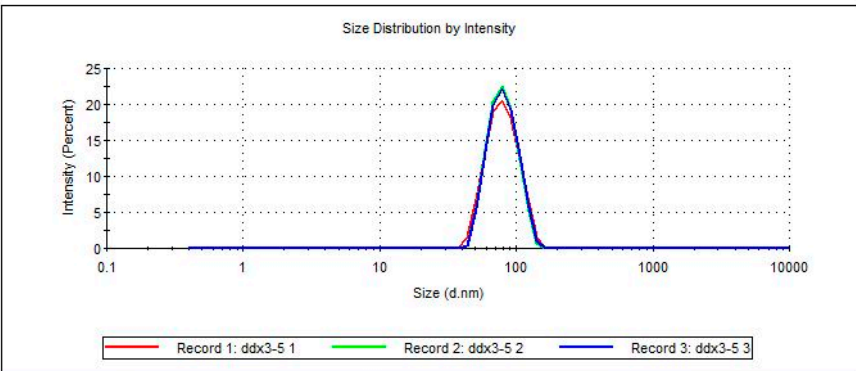

123.5

57%

LNP-siRNA#7

|                         | Size (d.nm):  | % Intensity: | St Dev (d.nm): |
|-------------------------|---------------|--------------|----------------|
| Z-Average (d.nm): 78,62 | Peak 1: 84,85 | 100,0        | 23,79          |
| Pdi: 0,072              | Peak 2: 0,000 | 0,0          | 0,000          |
| Intercept: 0,963        | Peak 3: 0,000 | 0,0          | 0,000          |
| Result quality : Good   |               |              |                |

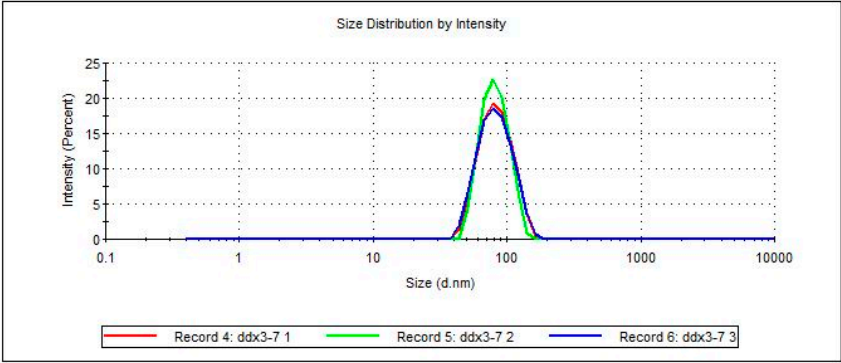

134.5

62%

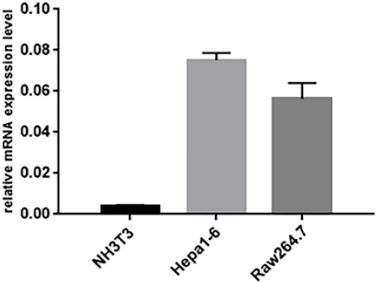

A.

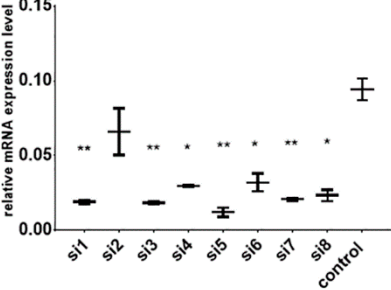

B.

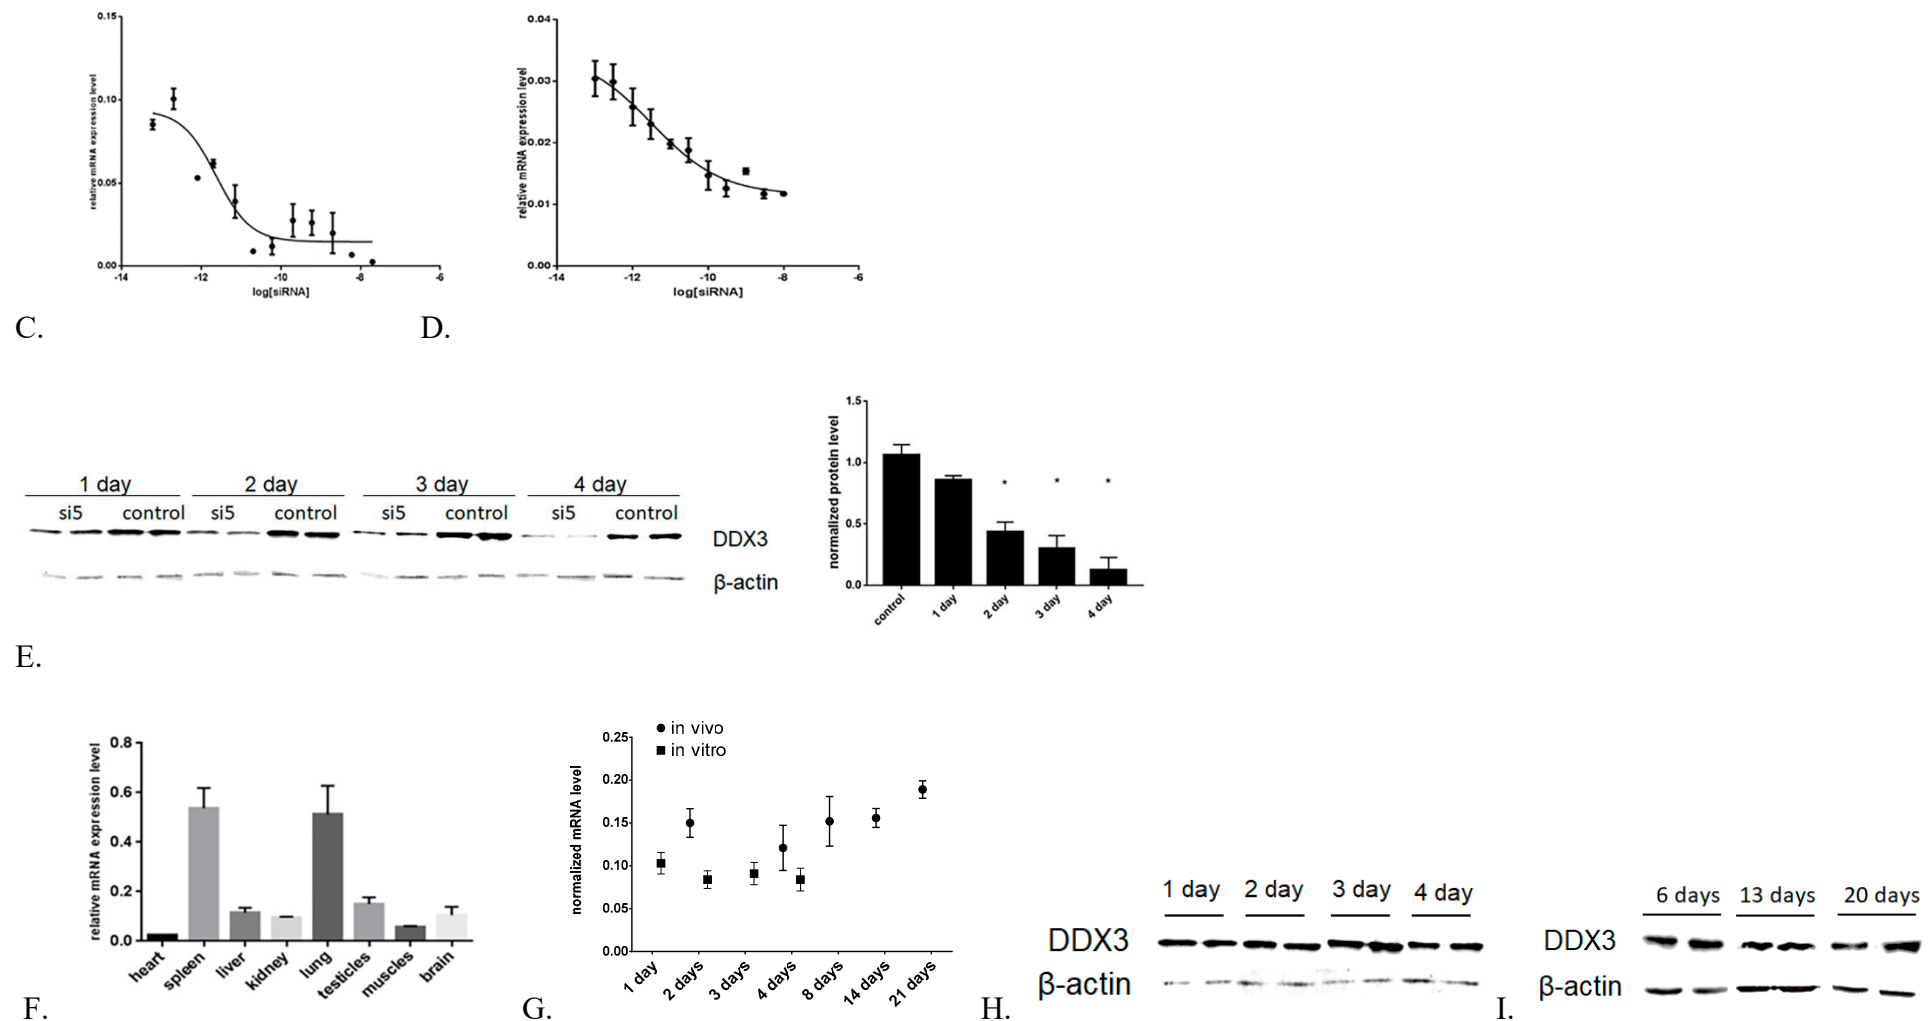

**Supplementary Figure S1.** A. Determination of the DDX3 mRNA expression level in different cell lines by RT-qPCR. B. Determination of the DDX3 siRNA efficacy in Hepa1-6 cells by RT-qPCR (\* $p < 0.05$ , \*\* $p < 0.01$ ). 1-8 are the numbers of siRNA from Suppl. table 1. Estimation IC<sub>50</sub> for si#5 (C.) and si#7 (D.) in Hepa1-6 cells by RT-qPCR. E. Determination the efficacy of the DDX3 protein inhibition in Hepa1-6 cells by Western-blot. F. Estimation DDX3 mRNA expression level in different murine organs by RT-qPCR. G. Estimation DDX3 mRNA expression level at the different time points after

the siLuc treatment (control siRNA) *in vitro* and *in vivo* by RT-qPCR. Determination the DDX3 protein level at the different time points after siLuc (control siRNA) treatment *in vitro* (H.) and *in vivo* (I.) by Western-blot.

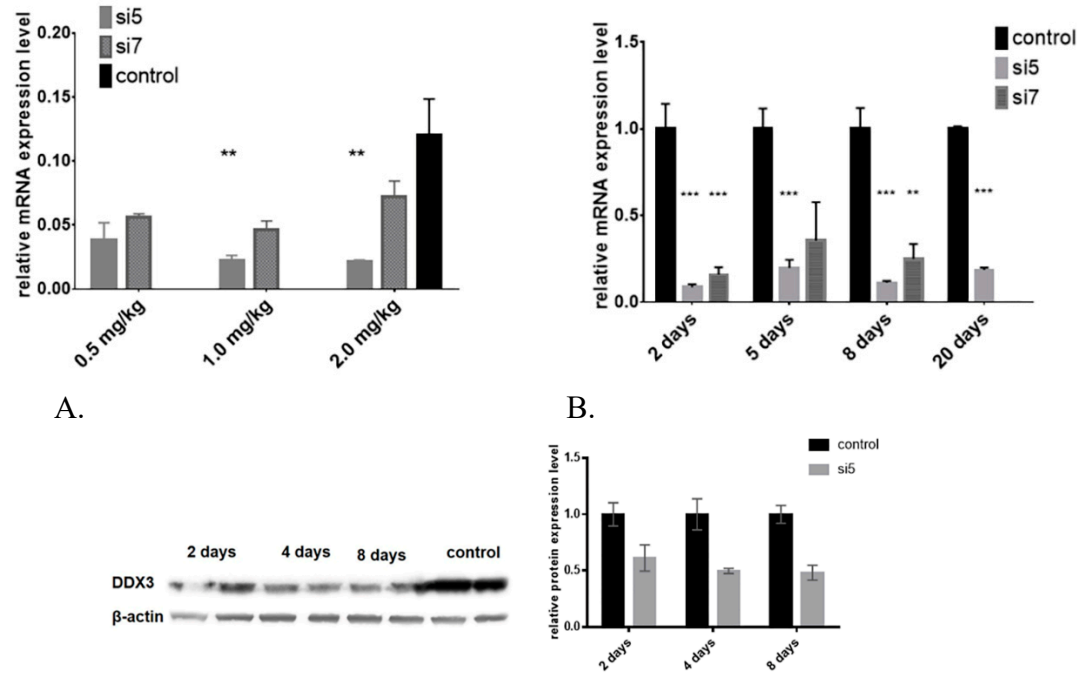

C.

**Supplementary Figure S2.** A. Estimation of the dose response for si#5 and si#7 by RT-qPCR in the murine liver. B. Determination of DDX3 mRNA recovery after RNAi-mediated inhibition by si#5 and si#7 by RT-qPCR. C. Determination the efficacy of DDX3 protein inhibition by Western-blot. \*p<0.05, \*\*p<0.01, \*\*\*p<0.001.

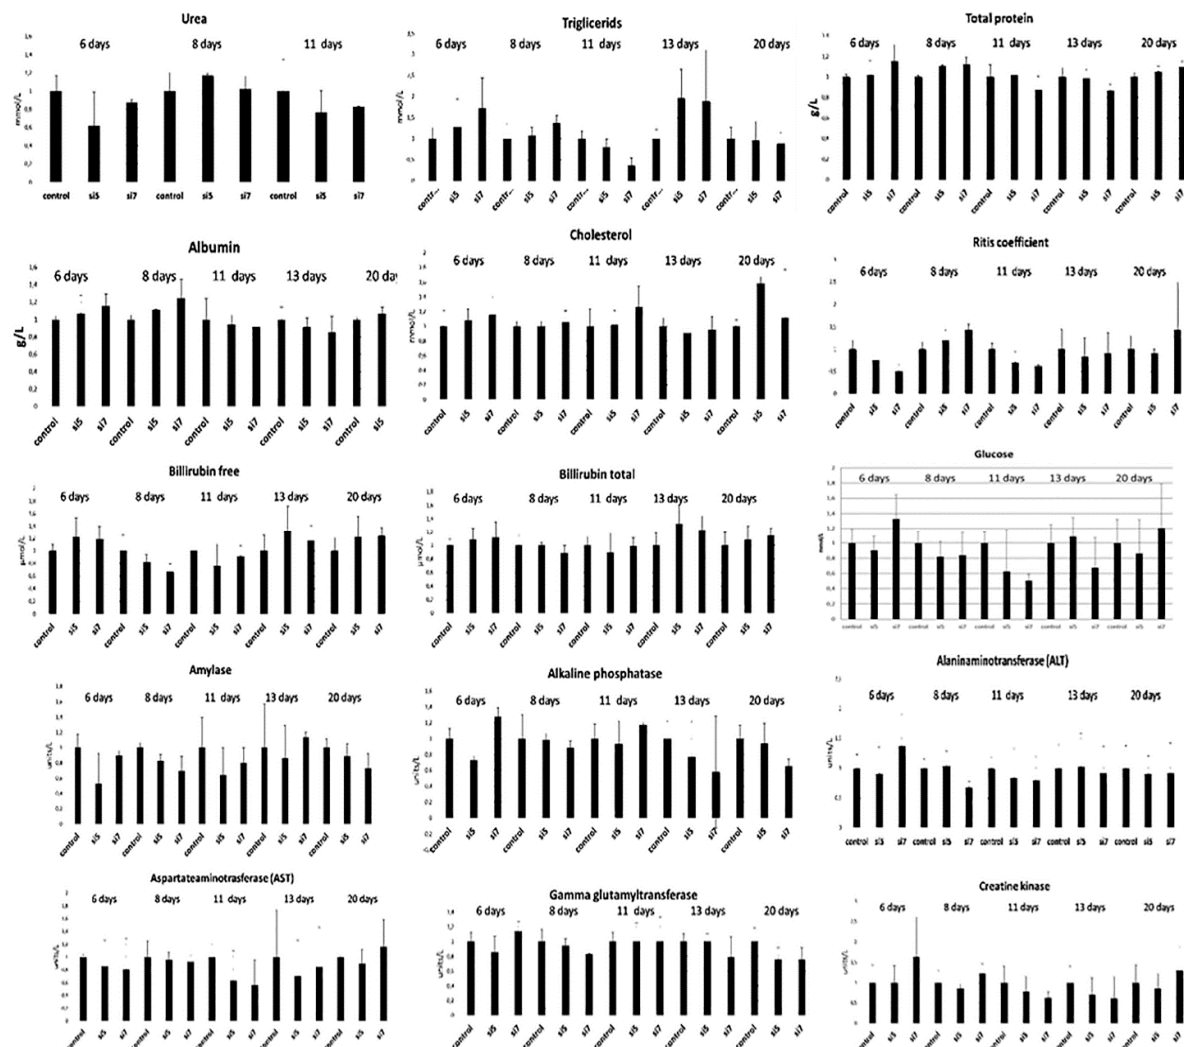

**Supplementary Figure S3.** Liver biochemical markers analyzed in animal blood after the administration of si#5 and si#7 biweekly for 3 weeks.

A.

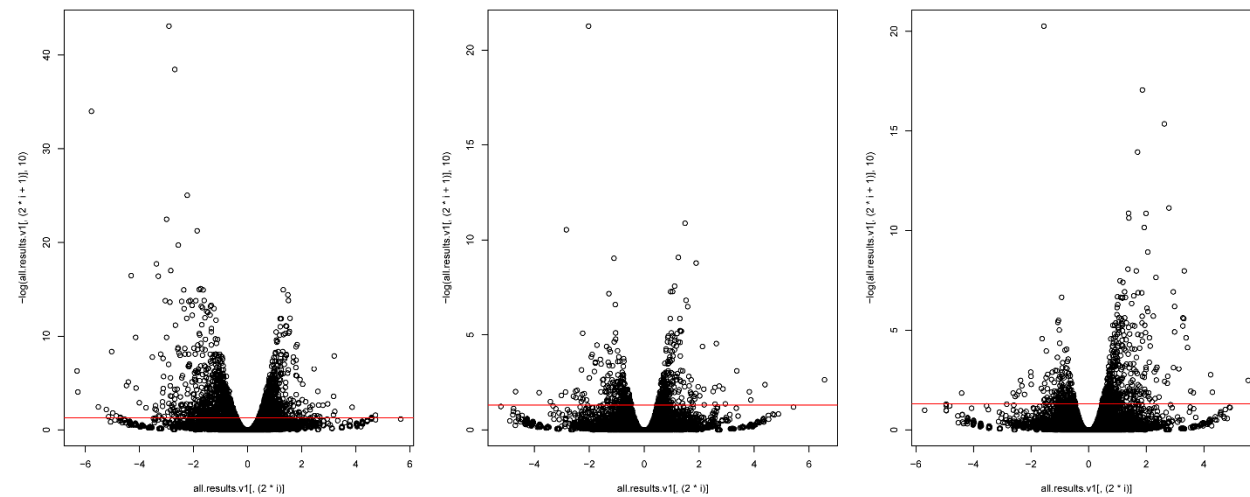

B.

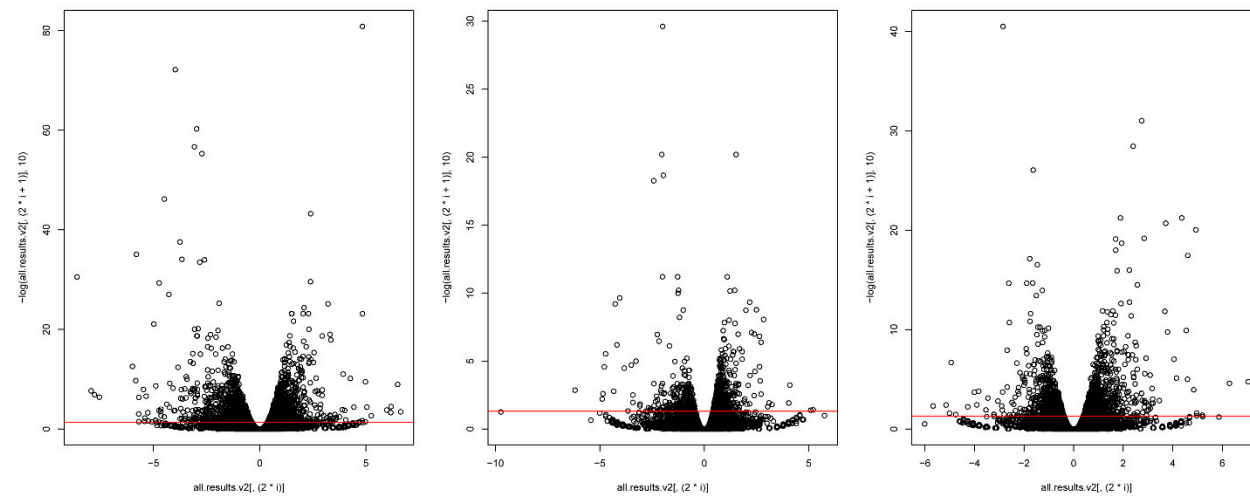



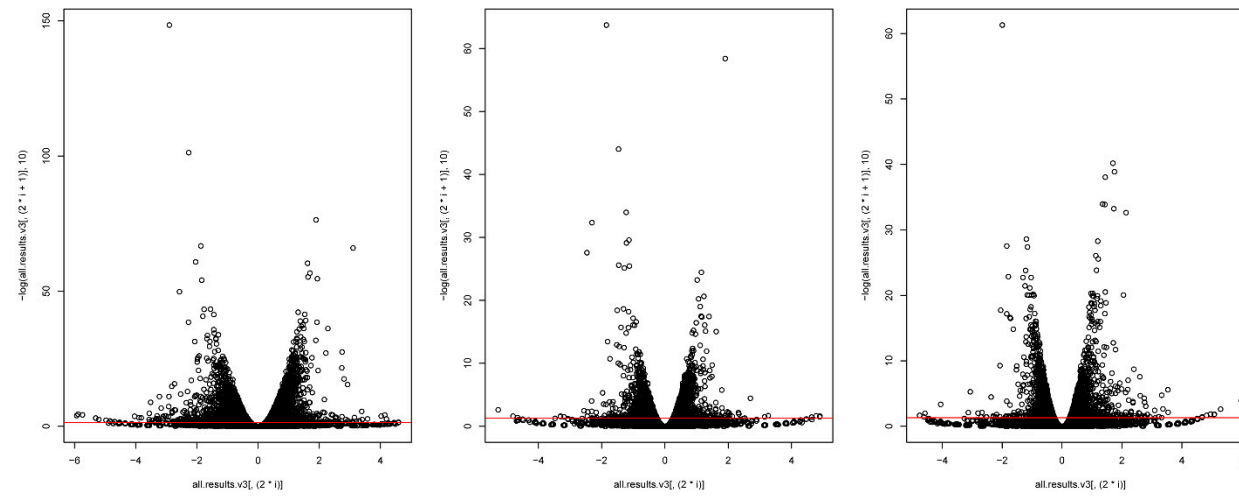

C.

**Supplementary Figure S4.** Volcano plots of gene expression after DDX3 depletion by siRNA #5 and siRNA #7 in A. cells, B. liver day 6, C. liver day 13.

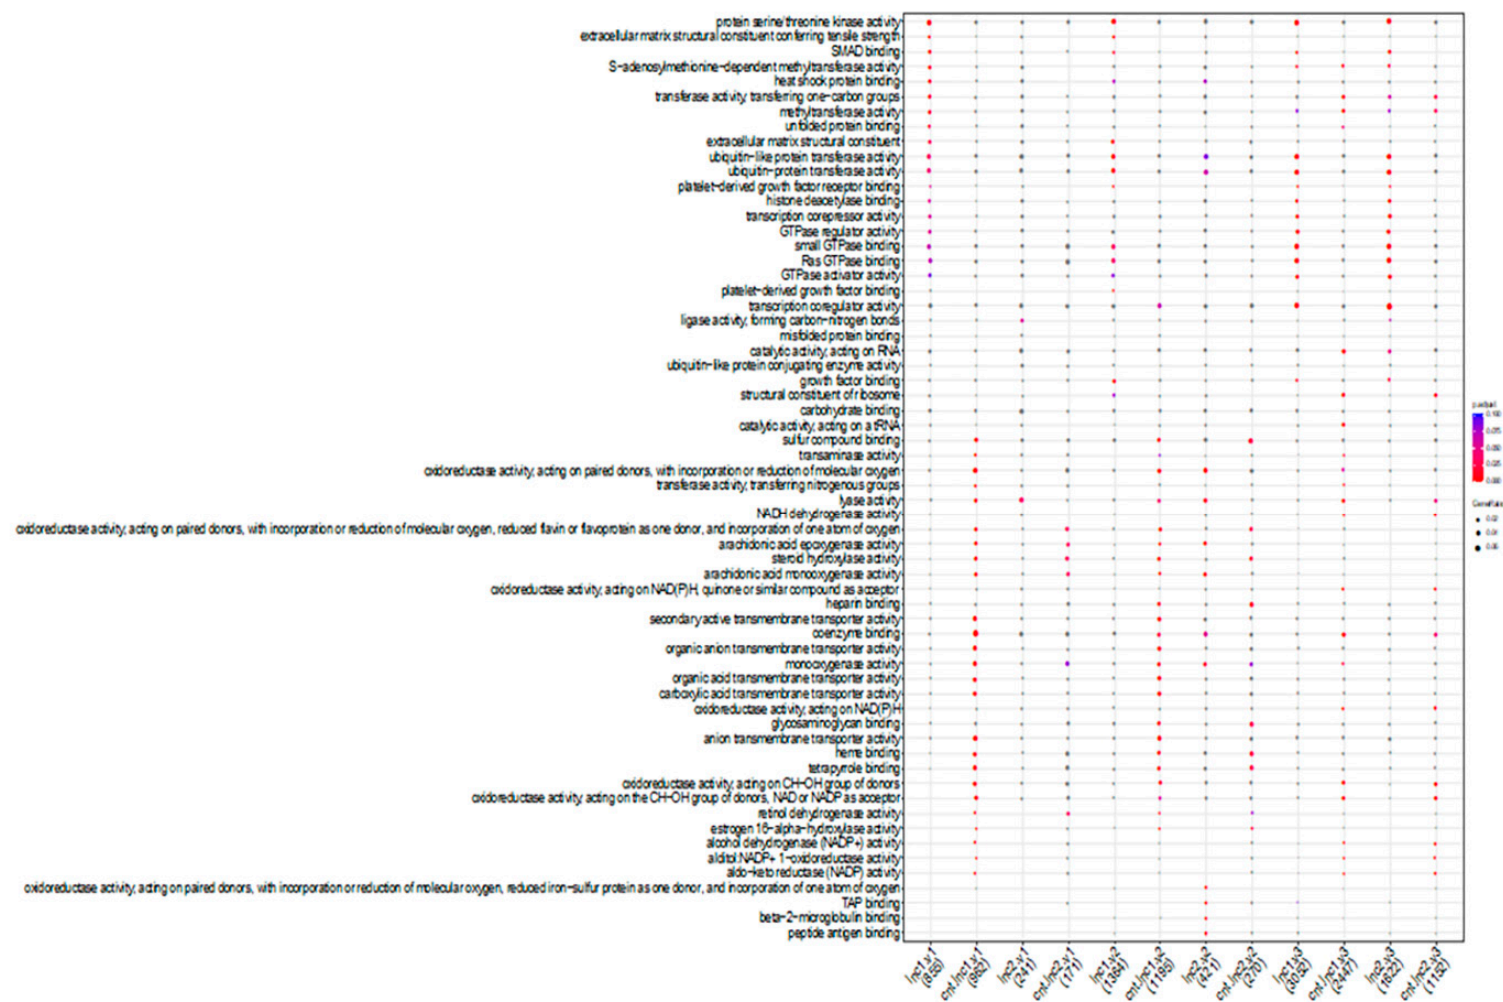

A.

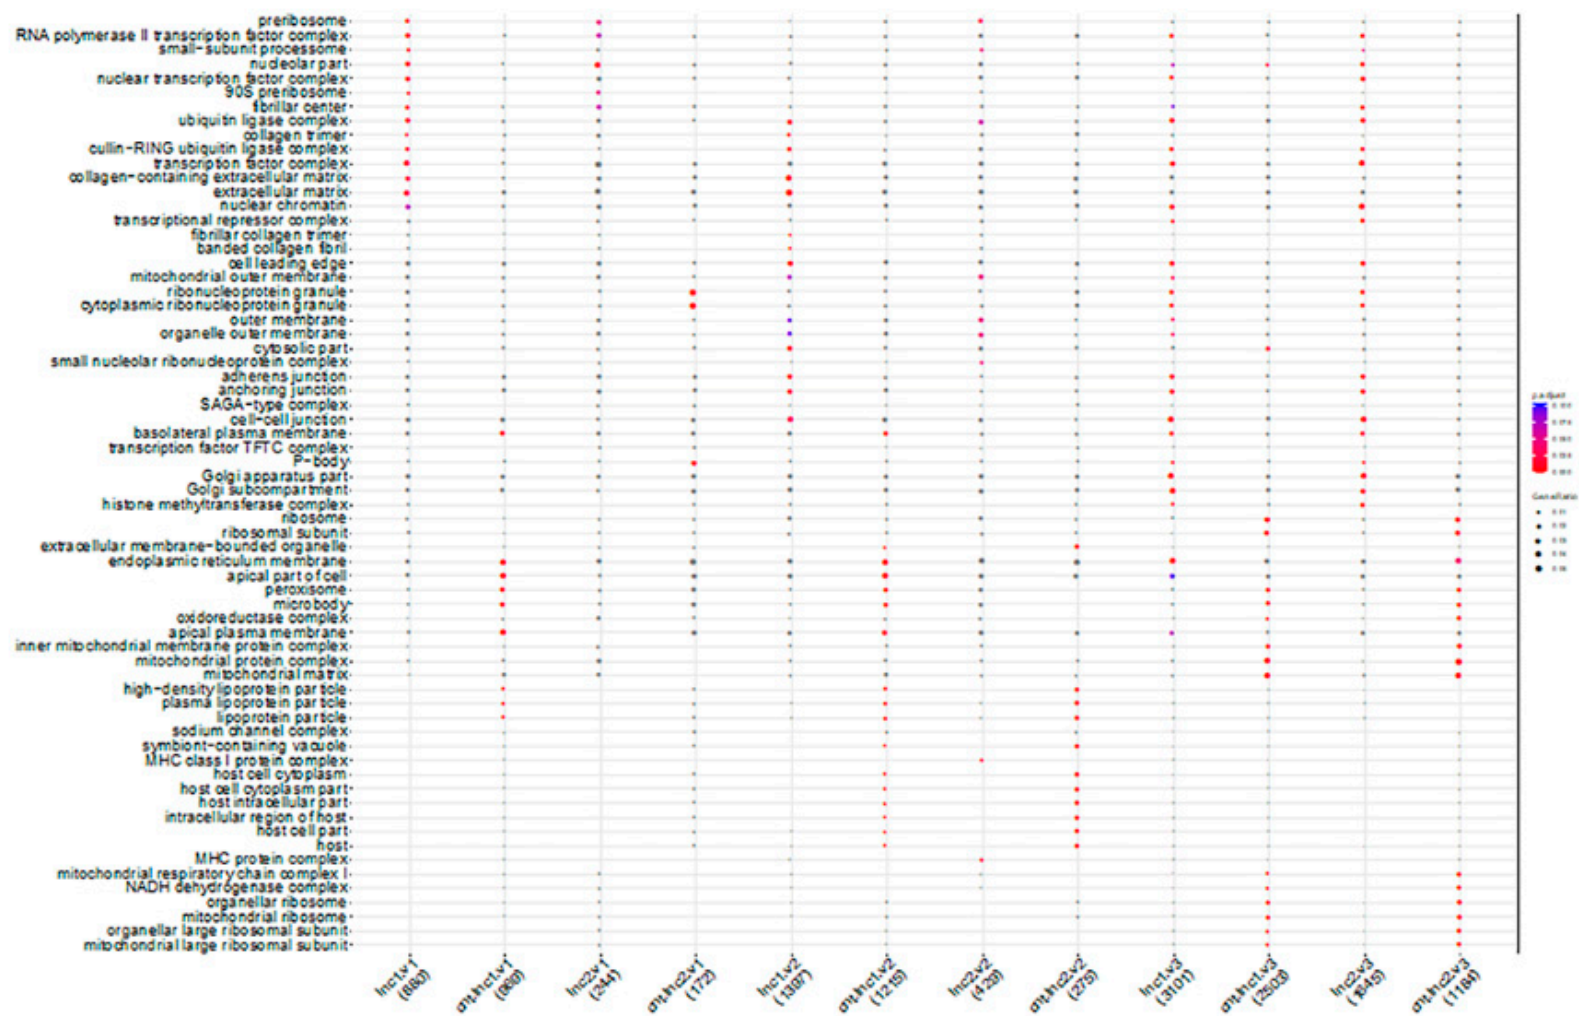

B.

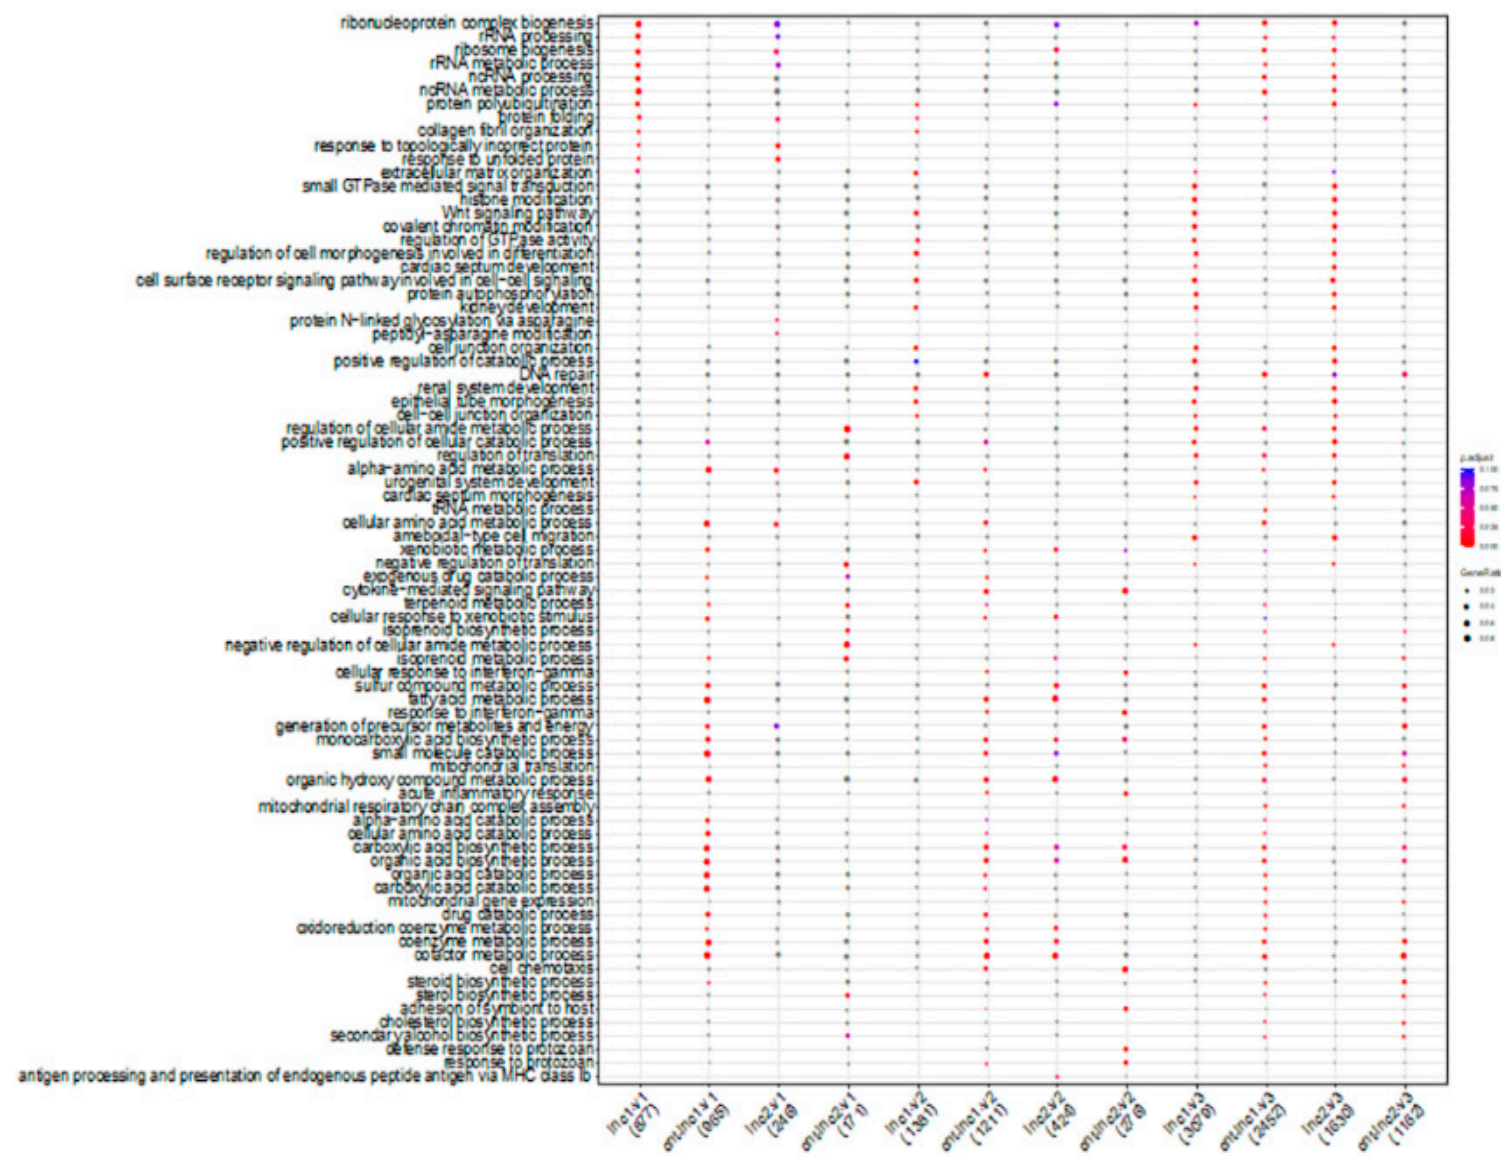

C.



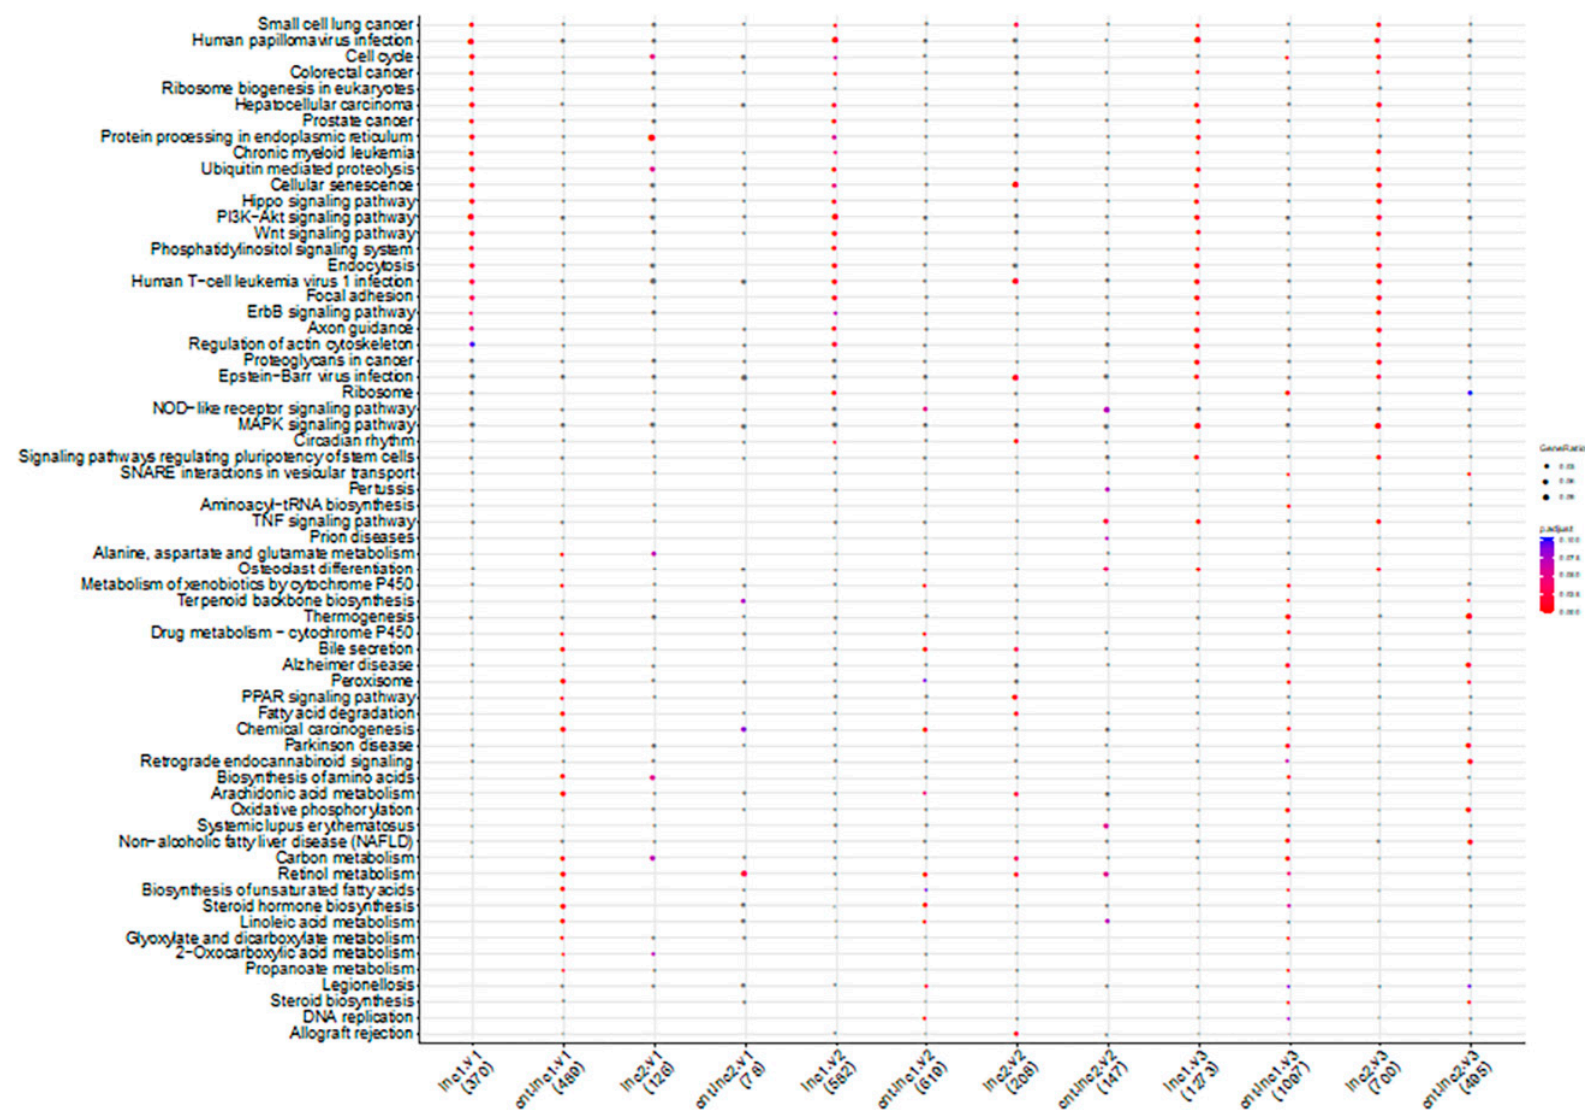

D.

**Supplementary Figure S5.** Gene ontology analysis of gene expression after DDX3 depletion (KD) by siRNA #5 and siRNA #7: A. molecular functions (MF), B. Cellular components (CC), C. Biological pathways (BP), D. KEGG. v1 marked liver samples at 6<sup>th</sup> day of DDX3 KD, v2 – liver samples at 13<sup>th</sup> day of DDX3 KD, v3 – cells after DDX3 KD. Lnc1 is siRNA #5, lnc2 – siRNA #7, cntrl – control cells.
